# Supplementary material
Source: PubMed Central journal article supplement (PMC4941233)
Supplement: NIHMS797486-supplement-Supplemental.pdf [file NIHMS797486-supplement-Supplemental.pdf]

## Supplementary Online Content

Vivante A, Golan E, Tzur D, et al. Body mass index in 1.2 million adolescents and risk for end-stage renal disease. *Arch Intern Med*. Published online October 29, 2012. doi:10.1001/2013.jamainternmed.85

**eTable.** Adjusted Hazard Ratios for All-Cause End-stage Renal Disease (ESRD) by Body Mass Index (BMI) at Age 17 Years, Stratified by Study Covariates

This supplementary material has been provided by the authors to give readers additional information about their work.

**eTable. Adjusted Hazard Ratios for All-Cause End-stage Renal Disease (ESRD) by  
Body Mass Index (BMI) at Age 17 Years, Stratified by Study Covariates**

\*Adjusted for sex, origin, period of enrollment and blood pressure (systolic blood pressure above or below the 95th age- and sex-specific percentile) (model 2). Normal weight is the reference category. All models yielded  $P < .001$ .

|                                                              |                        | <b>Underweight</b> | <b>Normal</b> | <b>Overweight</b> | <b>Obese</b>      |
|--------------------------------------------------------------|------------------------|--------------------|---------------|-------------------|-------------------|
| Percentile according to the 2000 CDC age-sex-specific charts |                        | <5th               | 5th to 84th   | 85th to 94th      | ≥95th             |
| <b>Variable</b>                                              | No of ESRD Cases/Total |                    |               |                   |                   |
| Sex: Male                                                    | 713/701,649            | 0.94 (0.65-1.35)   | 1             | 2.89 (2.34-3.56)  | 6.99 (5.52-8.85)  |
| Female                                                       | 161/493,055            | 1.08 (0.40-2.92)   | 1             | 3.41 (2.34-4.98)  | 6.14 (3.28-11.5)  |
| <b>Origin:</b>                                               |                        |                    |               |                   |                   |
| Europe/Americas                                              | 271/514,093            | 0.68 (0.28-1.65)   | 1             | 2.97 (2.20-4.00)  | 5.83 (3.96-8.57)  |
| Asia                                                         | 285/313,853            | 1.07 (0.66-1.73)   | 1             | 3.27 (2.34-4.58)  | 8.23 (5.53-12.3)  |
| North Africa                                                 | 261/288,498            | 1.07 (0.58-1.97)   | 1             | 2.36 (1.63-3.42)  | 5.49 (3.49-8.65)  |
| Israel                                                       | 25/58,459              | 1.93 (0.25-15.2)   | 1             | 8.73 (3.44-22.16) | 20.38 (7.32-56.7) |
| Unknown                                                      | 32/19,801              | -                  | 1             | 3.66 (1.46-9.18)  | 11.96 (4.98-28.7) |
| Non-Israeli born                                             | 159/137,152            | 0.52 (0.19-1.40)   | 1             | 2.06 (1.27-3.36)  | 6.06 (3.52-10.4)  |
| Israeli born                                                 | 715/1,057,552          | 1.07 (0.74-1.53)   | 1             | 3.23 (2.65-3.93)  | 7.09 (5.57-9.04)  |
| <b>Years of enrollment</b>                                   |                        |                    |               |                   |                   |
| 1967-1969                                                    | 227/72,233             | 0.70 (0.29-1.72)   | 1             | 3.95 (2.85-5.48)  | 7.29 (4.64-11.4)  |
| 1970-1979                                                    | 445/307,718            | 1.00 (0.63-1.59)   | 1             | 2.85 (2.19-3.71)  | 8.33 (6.23-11.1)  |
| 1980-1989                                                    | 163/409,229            | 1.05 (0.53-2.08)   | 1             | 2.14 (1.34-3.41)  | 4.38 (2.45-7.83)  |
| 1990-1997                                                    | 39/405,524             | 1.05 (0.25-4.47)   | 1             | 2.81(2.27-6.23)   | 2.76 (0.83-9.23)  |
| <b>Follow-up time - years</b>                                |                        |                    |               |                   |                   |
| 0-14                                                         | 108/1,194,704          | 0.16 (0.02-1.17)   | 1             | 1.38 (0.73-2.58)  | 2.30 (1.00-5.30)  |
| 15-30                                                        | 404/1,075,951          | 1.36 (0.88-2.08)   | 1             | 3.24 (2.49-4.22)  | 6.27 (4.46-8.80)  |
| 30-43                                                        | 362/396,324            | 0.81 (0.44-1.49)   | 1             | 3.35 (2.54-4.43)  | 9.76 (7.14-13.35) |
| Excluding first 10 years of follow-up                        | 830/1,187,226          | 1.03 (0.73-1.45)   | 1             | 3.14 (2.61-3.78)  | 7.11(5.67-8.91)   |
|                                                              |                        |                    |               |                   |                   |
